# Supplementary material for: Transcriptomic Analysis of Short-Term Salt-Stress Response in Mega Hybrid Rice Seedlings
Source: MDPI journal article supplement (doi:10.3390/agronomy11071328), 2021-06-29
Supplement: s1 [file s1]

**Supplementary Table S1.** Shoot length of LYP9 and two parents under control and salt stress conditions

| Traits  | CK              |                   |                 | 7 days         |                  |                | 14 days        |                 |                |
|---------|-----------------|-------------------|-----------------|----------------|------------------|----------------|----------------|-----------------|----------------|
|         | 9311            | LYP9              | PA64s           | 9311           | LYP9             | PA64s          | 9311           | LYP9            | PA64s          |
| SL(cm)  | 30.3±<br>2.0    | 34.5±<br>2.4**    | 28.6±<br>1.9    | 23.0±<br>1.4   | 27.8±<br>2.6**   | 24.6±<br>1.9   | 17.5±<br>1.0   | 24.1±<br>1.5**  | 19.8±<br>1.4   |
| SFW(mg) | 1230.3<br>±10.5 | 1704.7<br>±12.5** | 1089.7<br>±10.4 | 853.5±<br>10.1 | 978.0±<br>9.6**  | 881±<br>7.4    | 376.4±<br>5.0  | 510.0±<br>5.1** | 400.4 ±<br>4.8 |
| SDW(mg) | 411.6±<br>9.3   | 479.7±<br>10.3*   | 356.5±<br>9.5   | 110.4±<br>5.7  | 190.3 ±<br>7.2** | 166.6±<br>7.1  | 56.2±<br>6.8   | 91.4±<br>7.2**  | 68.9±<br>5.5   |
| RL(cm)  | 10.9±<br>0.5    | 13.9 ±<br>0.3**   | 11.2±<br>0.3    | 8.4±<br>0.4    | 12.2±<br>0.5**   | 10.1±<br>0.8   | 6.7±<br>0.4    | 9.1±<br>0.7**   | 7.8±<br>0.3    |
| RFW(mg) | 546.5±<br>11.8  | 630.2±<br>13.1**  | 526.7±<br>13.5  | 306.3±<br>11.3 | 460.4±<br>9.1**  | 436.7±<br>9.4  | 213.6±<br>4.1  | 360.3±<br>4.2** | 273.3±<br>3.3  |
| RDW(mg) | 66.7±<br>2.8    | 83.3±<br>5.7**    | 60.2±<br>3.7    | 50.7±<br>2.1   | 61.7±<br>3.7*    | 56.7±<br>3.4** | 34.2±<br>1.2** | 50.5±<br>3.0*   | 46.7±<br>1.7   |

Values are denoted as mean ± SD (n = 5). Differences between mean values of treatments and controls were compared using t-tests (\*P < 0.05, \*\*P < 0.01) according to LSD test.

**Supplementary Table S3.** Primers for RT-qPCR are listed

| Marker Name | Sequence                |
|-------------|-------------------------|
| 1F          | GGTCCAGAGCGGTATAGTGAAC  |
| 1R          | GTCATTCTGCTTGTCCCGCT    |
| 2F          | AGGGAGAACTTAAGCGGGAC    |
| 2R          | GCCTGTCAGGTTCTAGCAAGTT  |
| 3F          | TGGGAACTTGCTAGAACCTGAC  |
| 3R          | ATGCTGTTATCGTCGTGCAG    |
| Histone F   | GGTCAACTTGTTGATTCCCCTCT |
| Histone R   | AACCGCAAAATCCAAAGAACG   |
