# Supplementary material for: Transcriptomic Analysis of Short-Term Salt-Stress Response in Mega Hybrid Rice Seedlings
Source: MDPI journal article supplement (doi:10.3390/agronomy11071328), 2021-06-29
Supplement: s1 [file s1]

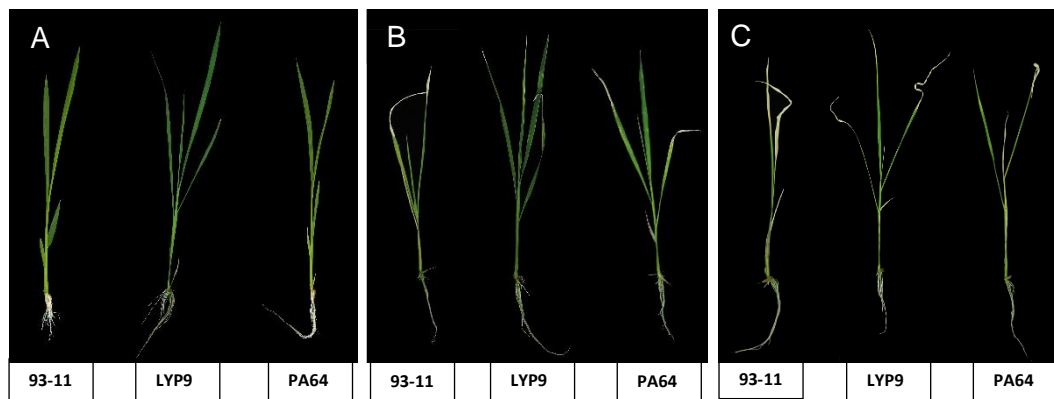

**Supplementary Figure S1.** Phenotypic characteristic of the hybrid LYP9 and two parents under control and salt stress conditions. (A) control; (B) 7 days salt acclimation; (C) 14 days salt acclimation.

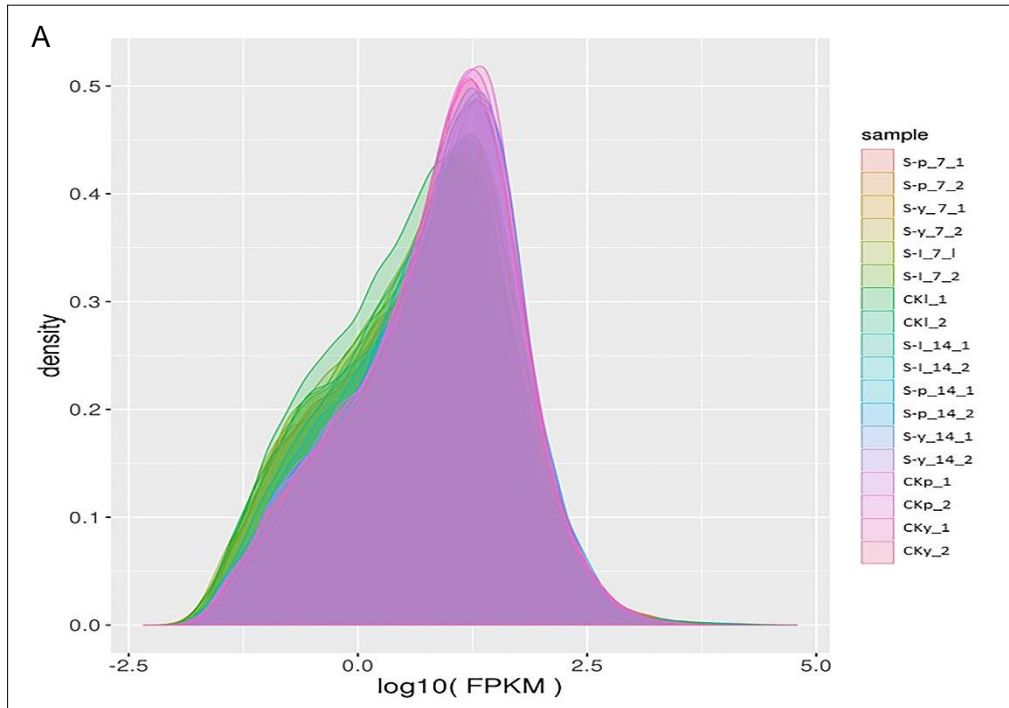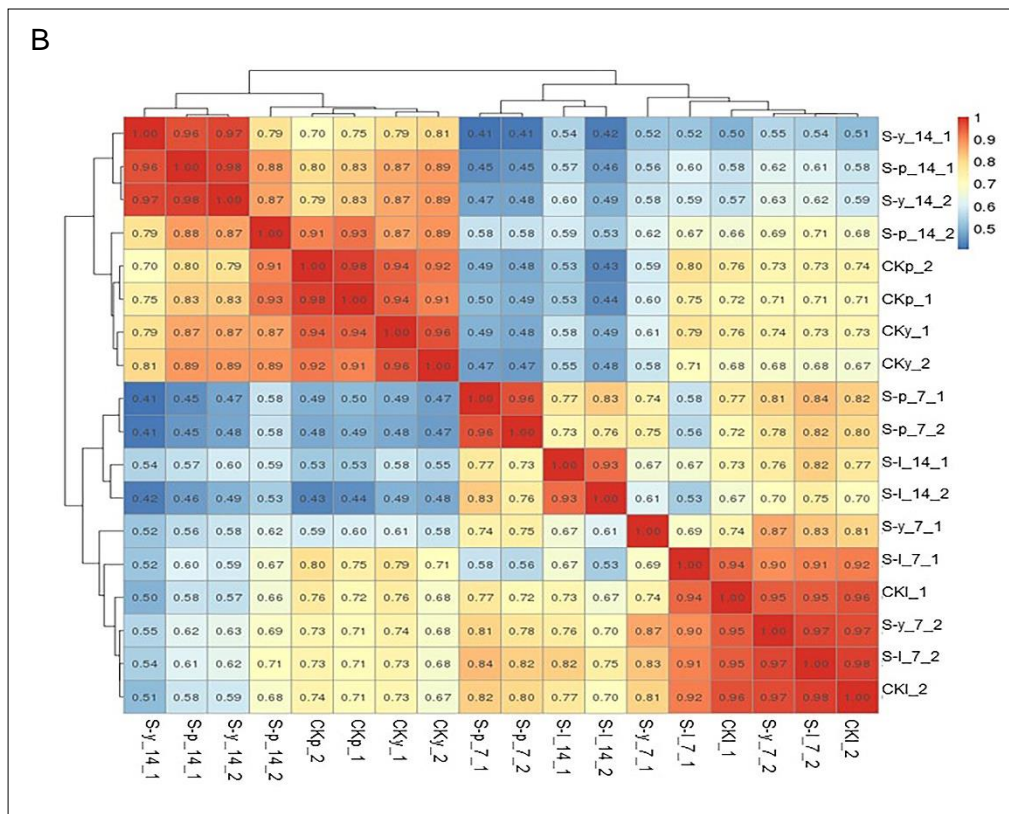

**Supplementary Figure S2.** (A) density plot based on the distributions of FPKM scores and (B) correlations among the experimental samples using Pearson correlation coefficient. Here, p represents PA64s, y is 93-11 and I is LYP9; CK is control, 7 represent 7 days stress treatment and 14 represent 14 days stress treatment.

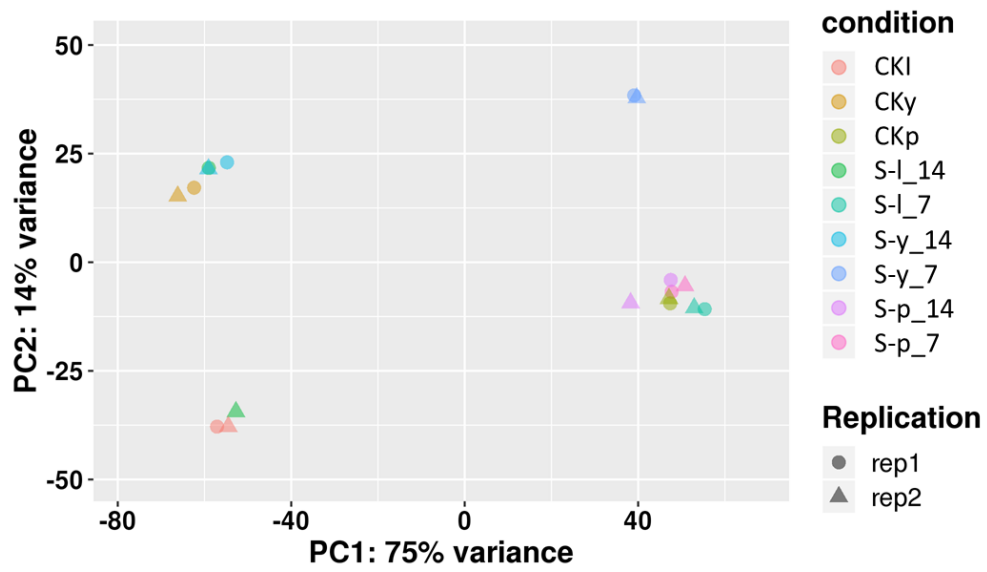

**Supplementary Figure S3.** PCA analysis and the r-index values. Here, p represents PA64s, y is 93-11 and I is LYP9; CK is control, 7 represent 7 days stress treatment and 14 represent 14 days stress treatment.

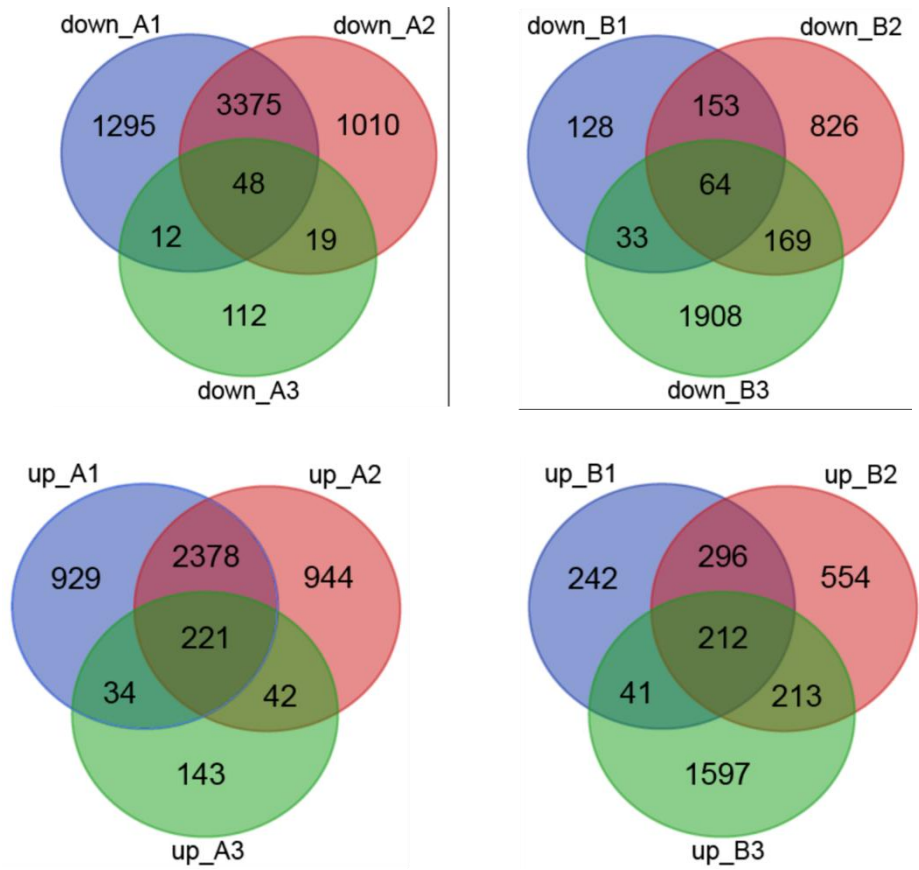

**Supplementary Figure S4.** Venn diagram for differentially expressed up and down regulated genes of three rice varieties LYP9, PA64s and 93-11 between the control and two salt treatments. Where, A1 (CKp vs. S-p\_7), B1 (CKp vs. S-p\_14), A2 (CKy vs. S-y\_7), B2 (CKy vs. S-y\_14), A3 (CKI vs. S-I\_7), B3 (CKI vs. S-I\_14).
